# Recombinant expression and characterisation of a lipase from the Antarctic zooplankton *Salpa thompsoni*

Ekta Rayani<sup>1</sup>, Alexander Cotton<sup>1</sup>, Iwan Roberts<sup>2</sup>, John Ward<sup>1</sup>, Will Goodall-Copestake<sup>3</sup>,  
Brenda Parker<sup>1\*</sup>

<sup>1</sup> Department of Biochemical Engineering, Bernard Katz Building, University College  
London, Gordon St London, United Kingdom WC1E 0AH

<sup>2</sup> Cytiva Ltd, Stevenage Bioscience Catalyst Gunnels Wood Road, Stevenage, United  
Kingdom, Hertfordshire, United Kingdom SG1 2FX

<sup>3</sup> Scottish Association for Marine Science, Oban, Argyll, Scotland PA37 1QA

## Abstract

Cold marine environments are abundant on earth and represent a rich resource for low temperature enzymes. Here we apply *in silico* bioprospecting methods followed by *in vitro* expression and biochemical analyses to characterise a novel low temperature lipase from the Antarctic tunicate *Salpa thompsoni*. A 586 amino acid pancreatic lipase-like gene was identified from *S. thompsoni* transcriptomic data, expressed as a hexahistidine fusion protein in *Escherichia coli* at 10°C and purified by affinity chromatography. Hydrolysis of the synthetic substrate p-nitrophenyl butyrate (PNPB) showed that this recombinant protein has optimal activity at 20 °C and pH 7, and a specific activity of 3.16 U/mg under this condition. Over 60% of enzyme activity was maintained between 15 to 25 °C, with a sharp decrease outside this range. These results are indicative of cold active psychrophilic enzyme activity. A meta-analysis of lipase activities towards PNPB showed that the novel *S. thompsoni* lipase displays a higher activity at lower temperatures relative to previously characterised enzymes. The work demonstrates a methodology for conversion of transcriptomic to *in vitro* expression data for the discovery of new cold-active biocatalysts from marine organisms.

## Keywords

Lipase, salp, bioprospecting, biocatalysis, psychrophilic enzymes,

## Abbreviations

Salps – *Salpa thompsoni*

## Introduction

Low temperature environments, while seemingly inhospitable, contain a variety of life forms that present a rich treasure trove for bioprospecting (Wagner Fernandes Duarte et al. 2018). The world's oceans that encompass the largest biome on Earth (Keith et al. 2020) and most cold environments are marine. These include not only polar surface waters but also waters found at depth below the thermocline. Despite the broad geographic coverage of low temperature marine environments, they remain underexplored from a bioprospecting perspective because they are typically remote and complex to access.

Psychrophilic biocatalysts are cold adapted enzymes that may be found in organisms inhabiting environments where the temperature for growth is 15°C or lower (Moyer and Morita 2007). By definition, these enzymes are most active below 30°C (D'Amico et al. 2003; Feller and Gerday 2003). Psychrophilic enzymes possess several features that are thought to ameliorate the exponential slowing of chemical reactions at decreasing temperatures to maintain crucial functions. Glycine clusters around the active site provide thermostability and structural flexibility to encourage higher activity (Veno et al. 2019). Increased hydrophobic surface residues and increased hydrophilic groups within protein cavities contribute to conformational stability and enhance ionic reaction catalysis (Metpally and Reddy 2009). Amino acid composition also influences the overall conformational stability, for instance a high lysine-to-arginine ratio was previously shown to be important in cold adaptation (Siddiqui et al. 2006).

Enzymes from the triglyceraldehyde hydrolase family, known as lipases, E.C 3.1.1.3, are an industrially important class of biocatalysts. Their primary function in native conditions is to hydrolyse carboxylic ester bonds in hydrophobic compounds. In aqueous conditions lipases catalyse the hydrolysis of carboxylate ester bonds into free fatty acids (FFAs) and organic alcohols. Lipases are also able to catalyse reactions in organic solvents including esterification and transesterification (Chandra et al. 2020). A range of recombinant lipases have been produced from bacterial (Salwoom et al. 2019; Schumann and Ferreira 2004; Guozeng Wang et al. 2016), fungal (Lin et al. 2017; S.-J. Tang et al. 2000) and mammalian sources (Kawaguchi et al. 2018; Valdez-Cruz et al. 2017). These industrially relevant classes of enzymes include *Candida antarctica* Lipase B (Cal-B) derived from a low temperature Antarctic yeast. This enzyme is valuable due to its high enantioselectivity, ability to recognise a wide range of

substrates, thermal stability, and capacity to catalyse reactions in polar solvents which facilitates the application of Cal-B in organic synthesis (Stauch, Fisher, and Cianci 2015).

Lipases that have been optimised to function at lower temperatures have potential applications in the fine chemical and personal care sectors. They have been applied for the synthesis of high value chiral intermediates for pharmaceutical applications (Patel, Banerjee, and Szarka 1997) and for the production of biologically active compounds such as xanthenes used in the synthesis of insecticidal molecules (Jiang et al. 2014). Furthermore, low temperature lipases afford the opportunity for enzyme inactivation at higher temperatures to enable precise control over thermally sensitive reactions (De Santi et al. 2014). For bulk processes, the lower energy requirement of cold temperature biocatalysts can represent a benefit in terms of sustainability (Cavicchioli et al. 2011). This range of applications has motivated explorations for novel lipases from multiple environmental sources. However, while lipases from polar bacteria and yeasts have been explored for low temperature activity, lipases originating from more complex eukaryotic organisms inhabiting cold environments remain under-investigated as potential sources for new biocatalysts.

*Salpa thompsoni* is a marine animal found in the Southern Ocean surrounding Antarctica (Figure 1). Commonly referred to as a salp, it is a zooplankton from the tunicate group, which is an early diverging lineage of chordates (Ambrosino et al. 2019). In contrast to the vast majority of salp species that occur in tropical to temperate waters, *S. thompsoni* appears to have evolved as a low temperature adapted species (Goodall-Copestake 2018). It is capable of immense population blooms at temperatures from 3°C to 5°C degrees (Henschke and Pakhomov 2019). As such, this species might be expected to have evolved an effective low temperature metabolism which potentially involves psychrophilic enzymes of industrial relevance. These could include FFA digesting lipases that assist *S. thompsoni* in processing the wide range of food particles it obtains through filtration (von Harbou et al. 2011).

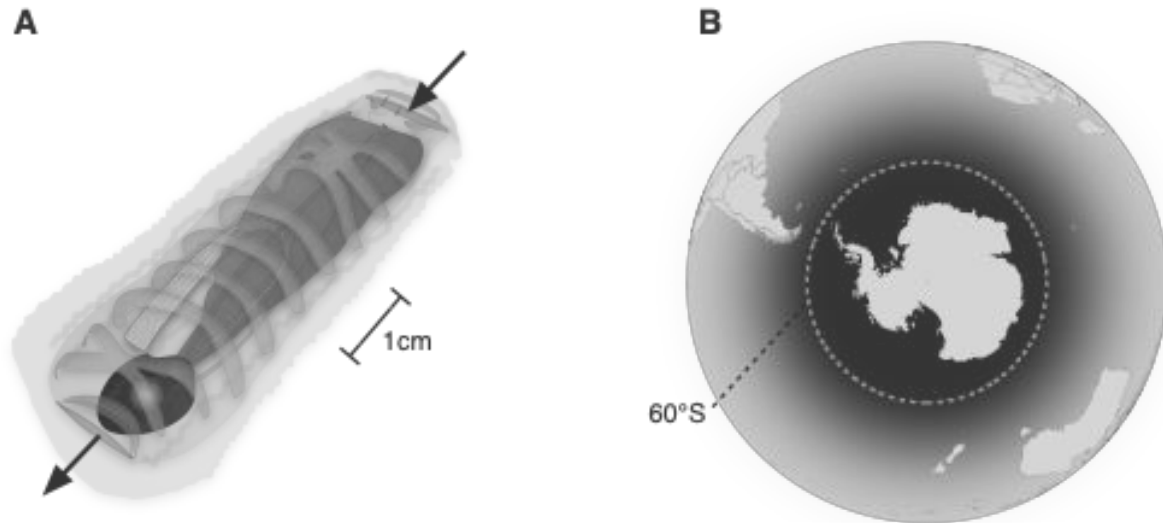

**Figure 1: Schematic of the translucent zooplankton *Salpa thompsoni* with gut highlighted in dark grey, filter in mid grey and arrows to indicate water inlet and outlet (A), and generalised *S. thompsoni* distribution highlighted in dark grey, where 60 °S marks the northern limit of the Southern Ocean. Figure adapted from Foxtton 1966; Van Soest 1974.**

Here we used a bioinformatic bioprospecting workflow to identify a putative lipase gene from *S. thompsoni* as a novel, potential low temperature lipase. This was subsequently expressed in a bacterial host and purified to allow for functional characterisation using a common substrate. Optimising heterologous expression in bacterial host systems, such as *Escherichia coli* facilitates more robust manufacture of biocatalysts (Rosano and Ceccarelli 2014). The results obtained were compared against previously published activities on the same substrate from other animals, plants, fungi and bacteria in order to contextualise cold temperature activity amongst lipases from all kingdoms of life.

## Materials and Methods

### Identification

A putative *S. thompsoni* lipase was identified using the annotated genome of the tunicate and model organism *Ciona intestinalis* (Godeaux, 1981). NCBI GenBank was interrogated using the search terms "Ciona intestinalis"[Organism] AND lipase [All Fields] (Agarwala et al. 2018; Altschul 1997) to recover a 'pancreatic lipase-related protein' from *C. intestinalis*; GenBank accession **XP\_002130573.1**. As pancreatic lipases are one of the main digestive enzymes used to break down dietary fat molecules in animals (Zhu et al. 2021), this accession was used to search for a novel, orthologous lipase gene from *S. thompsoni*.

The un-annotated *S. thompsoni* transcriptome assembly (GenBank **GFCC00000000.1**; Battalona *et al.*, 2016) was queried using the accession **XP\_002130573.1** with the tBLASTn tool as implemented in the software package GeneiousPrime version 2021.1 (Kearse *et al.*, 2012). This identified *S. thompsoni* assembly sequence **GFCC01067991** which contains a 1761bp open reading frame and putative orthologue of **XP\_002130573.1**. To assess if this enzyme was expressed in the digestive system, short read archive data generated solely from *S. thompsoni* gut RNA (samples AC\_e20 and AC\_e242, accession numbers **SRX13276964** and **SRX13276963**, respectively) were screened for matching sequences using the Map to Reference method in Geneious under the LSF setting (word length 24, index word length 14, maximum mismatches per read 10). Sequence characterisation of the 1761bp lipase sequence was carried out using the ExPASy Protein Parameter tool to identify physical and chemical parameters including the molecular weight and amino acid composition (Artimo P 2020; Gasteiger et al. 2005). InterProScan analysis was also used, to identify predictive domains using a genome-scale protein function classification (Jones et al. 2014).

### Expression of lipase

The 1761bp *S. thompsoni* lipase sequence was synthesised and codon optimised by GenScript (Leiden, Netherlands). Codon optimisation increased the GC content from 44.4% to 55%. The codon-optimized lipase was cloned within the expression vector pET-28a (+) with an N-terminal hexahistidine tag to aid purification. The plasmid was transformed into competent *E. coli* ArcticExpress (DE3) cells (Agilent, Santa Clara, CA, USA) through heat shock methodologies following manufacturer's guidelines. Two biological chaperonins from cold active species were co-transformed for increased protein solubility, Cpn 10 and Cpn 60, with

high similarity to the *E.coli* chaperones GroEL and GroES (Belval et al. 2015; Ferrer et al. 2003). *Escherichia coli* harbouring the salp lipase was inoculated overnight in terrific broth (TB) medium (10ml) supplemented with kanamycin and gentamycin and grown at 37°C and 125 rpm. Subsequently, 500 mL TB medium was inoculated with 2 mL of the preculture and incubated at 30°C until an OD600 of 4 was reached. Gene expression was induced on ice by addition of isopropyl-β-D- thiogalactopyranoside (IPTG) to a final concentration of 1mM. The cultures were incubated at 10°C at 180 rpm for 24 h. Cultures were harvested after 24 hours by centrifugation (10,000g, 10 minutes at 4 °C). Cell pellets were collected and stored at - 20°C for further analysis (Akbari et al. 2010).

Cultures were analysed for expression levels using Bolt™ Sample buffers and Reducing Agents as per the manufacturer's guidelines, with 12% gels stained using Coomassie brilliant blue for SDS analysis. Gels were visualised using Amersham™ Imager 600 (GE healthcare, USA). Western blotting (Burnette 1981) was carried out using the Bio-Rad Trans-Blot® Turbo™ Transfer System. Subsequent methodologies were adapted from previous work (Colant et al. 2021). The membrane was incubated with the primary antibody: Anti-His mouse monoclonal antibody (ab18184, Abcam) diluted 1:1000 in TBST-M for two hours. The membrane was then washed with TBST before being incubated with the secondary antibody: Goat anti-mouse HRP conjugated antibody (HAF007, Biotechne), diluted 1:1000 in TBST-M. Imaging took place using The Pierce ECL Western Blotting Substrate (Thermo Fisher Scientific) for 1-2 minutes in darkness then exposed and imaged using an Amersham™ Imager 600 (GE Healthcare).

### Purification

Purification was carried out as described by (Spriestersbach et al. 2015). Ni-NTA Superflow cartridges (Qiagen, Sussex, UK) were equilibrated with 10 mL of binding buffer (50 mM NaH<sub>2</sub>PO<sub>4</sub>, 300 mM NaCl and 10 mM imidazole). The clarified lysate was loaded into the cartridge and subsequently washed with 20 mL of wash buffer (50 mM NaH<sub>2</sub>PO<sub>4</sub>, 300 mM NaCl and 25 mM imidazole). The enzyme was eluted with 5mL of elution buffer (50 mM NaH<sub>2</sub>PO<sub>4</sub>, 300 mM NaCl and 150 mM imidazole). Ammonium sulfate at 70%, was used to precipitate and store the protein at 4 °C.

## Characterisation

A lipase activity assay was performed using *p*-nitrophenyl substrates with modifications (U. K. Winkler and Stuckmann 1979). In brief, the reaction mixture consisted of 125  $\mu$ l of 55 mM phosphate buffer adjusted to pH 7 and 10  $\mu$ l of the substrate 1 mM *p*-nitrophenyl butyrate (PNPB) (Sigma N9876) homogenised in 2-propanol. The mixture was pre-incubated at 20°C for 10 minutes and then 15  $\mu$ l of the 0.5mg/ml enzyme solution was subsequently added. After 15 minutes of incubation at 20°C, the reaction was terminated using an equal volume of 0.25 M sodium carbonate pH 10.5 (Ozcan et al. 2009) and ethanol. The absorbance of the liberated 4-Nitrophenol was measured at 410 nm using multi-well plate reader (Clariostar, BMG Labtech). One unit (U) of lipase activity was defined as the amount of enzyme that released 1  $\mu$ mol of 4-Nitrophenol per minute. Lipase concentration was measured by the method of Bradford with bovine serum albumin as a standard (Bradford 1976). The temperature profile of the salp lipase was measured at 5 to 60 °C for 15 minutes. A pH stability test was performed by pre-incubating the lipase for 10 minutes at 4 °C in the buffers and assessing activity at the optimum temperature. The effect of pH on lipase activity was assayed at pH 6–9 by measuring the amount of 4-Nitrophenol liberated using PNPB (C4) as a substrate. The buffer systems used to assess pH effects were: 55mM sodium phosphate buffer (pH 6–8), 55mM Tris–HCl buffer (pH 9).



## Results and Discussion

A putative 1761bp salp lipase, subsequently referred to as PL002, was identified within the salp transcriptome assembly sequence GFCC01067991 using bioinformatic methods. This sequence had a 46% amino acid identity to the pancreatic lipase accession XP\_002130573.1 from *C. intestinalis*, and a 36% similarity to that of the Human Pancreatic Lipase (Waterhouse et al. 2018) inferred through the Swiss Model Homology tool, thus suggesting that PL002 is a pancreatic-like lipase (Figure 2). Identical DNA sequence transcripts were found within cDNA reads isolated from the *S. thompsoni* gut sample AC\_e20, and 99.7% identical transcript sequences were recovered from *S. thompsoni* sample AC\_e242. This corroborated the identification of this lipase as of salp origin and demonstrated that it is expressed in the gut consistent with the hypothesised digestive function.

Bioinformatic characterisation of sequences was used to confirm several structural features found within lipases. Alpha-beta hydrolases locate the nucleophilic serine across the two other residues of the catalytic triad (Denesyuk et al. 2020). The catalytic triad consists of Ser-208, from the conserved pentapeptide, Asp-235 and His-314 (Figure 2), which is critical for lipase activity (Brumlik and Buckley 1996; F. K. Winkler, D'Arcy, and Hunziker 1990) and common to all enzymes from the serine hydrolases family (Lazniewski et al. 2011). It was found in PL002 alongside the conserved pentapeptide, Gly-206 Phe-207 Ser-208 Leu-209 Gly-210, corresponding to a nucleophilic elbow motif housing a nucleophile serine residue required for catalytic activity (Figure 2). A SignalP-TM was also identified in the N-terminus which may suggest that this lipase is in the secretory pathway but may not necessarily be a secretory enzyme (Nielsen 2017).

Another highly conserved feature of lipases present within the PL002 sequence that occurs in the catalytic domain was Cys-295, His-296, Val-311 and Cys-312. Variations in this lid domain can be used to explain substrate affinity (Ollis et al. 1992; Saavedra et al. 2018) and temperature dependence studies have shown that the lid structure in cold active lipases is smaller than in other lipases active at higher temperatures (Khan et al. 2017). A similar lid structure has also been identified in other aquatic invertebrate neutral lipases from the microcrustacean *Daphnia pulex* (Colbourne et al. 2011). It has been suggested that the cysteine residues contribute

towards a disulfide bridge, this has been observed in mammalian pancreatic lipases, particularly that of the secondary fold, the  $\beta$ 9 loop (Lowe 2002).

The Expasy Protein Parameter tool (Duvaud et al. 2021) showed that 50% of all glycine amino acids were clustered around the nucleophilic elbow and the active site/lid (Figure 2). In this region glycine clusters potentially encourage greater local mobility of the active site and also support the stability of the enzyme (Mavromatis et al. 2002; Siddiqui et al. 2006).

InterProScan analysis predicted domains within the salp lipase (Lu et al. 2020) based on conserved molecular functions (Figure 2). They included the PLAT (Polycystin-1, Lipoxygenase, Alpha-Toxin) and LH2 (Lipoxygenase homology) domains that are found within membrane or lipid associated proteins (Bateman and Sandford 1999). These domains were identified from Superfamily (Gough et al. 2001; Wilson et al. 2009) and Pfam (Mistry et al. 2021) databases. Lipase domains were also identified through PRINTS (Attwood et al. 2003), Pfam (Mistry et al. 2021) and CDD (Lu et al. 2020) protein prediction software databases.

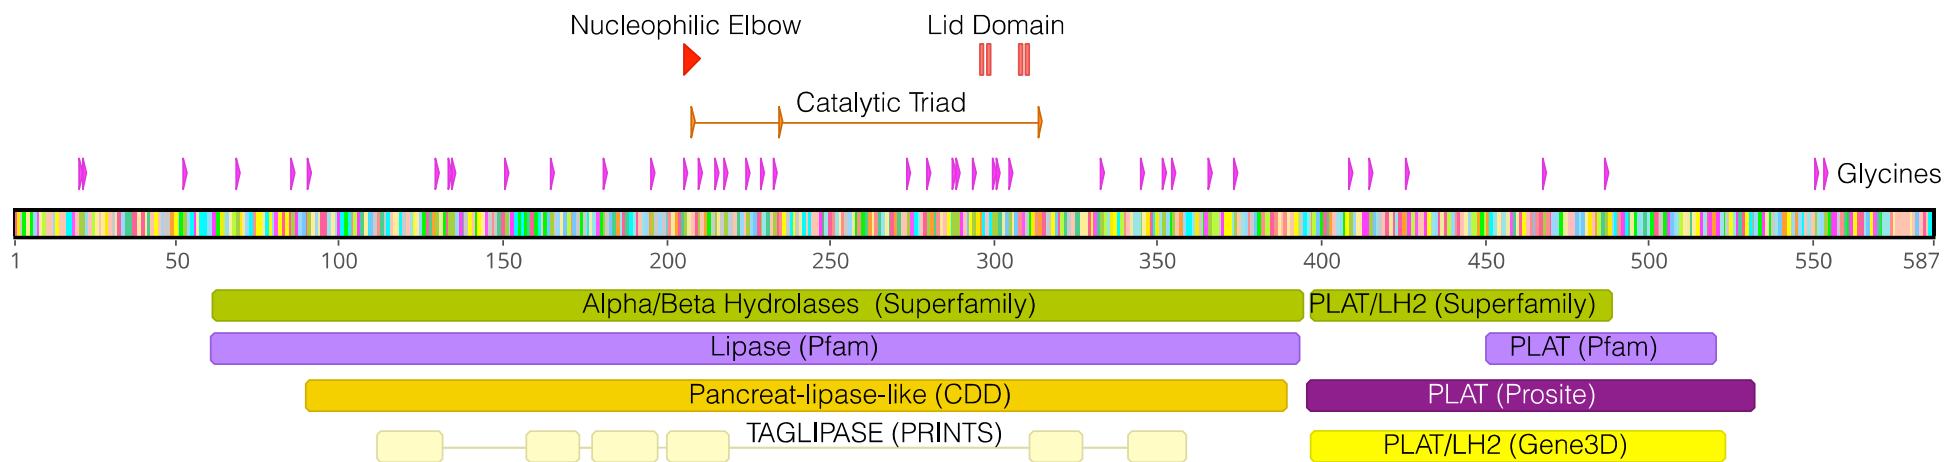

**Figure 2: Annotated PL002 amino acid gene sequence of the putative pancreatic salp lipase with InterProScan identified motifs**

PLAT (Polycystin-1, Lipoxygenase, Alpha-Toxin) domains, Lipase domains, LH2 (Lipoxygenase homology) identified using InterProScan analysis. Further structural motifs and molecular functions have been highlighted.

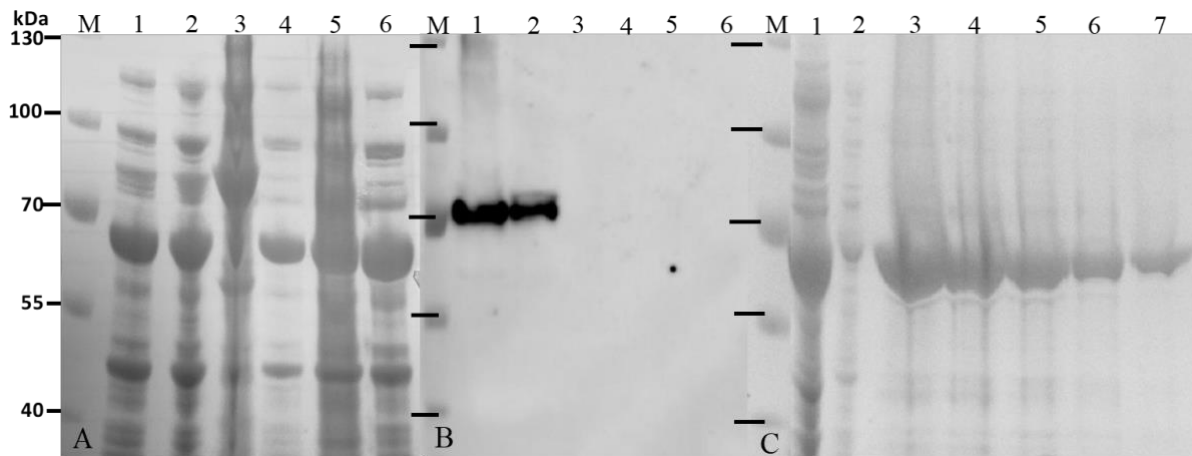

**Figure 3: Confirmation of recombinant expression of PL002 using SDS-PAGE (A), Western blot (B), and Purification of PL002 (C)**

A Coomassie Blue stained SDS PAGE (A) and its corresponding Western Blot developed using chemiluminescence with the Anti-His mouse monoclonal antibody (ab18184, Abcam)

For images A and B: Lanes 1 and 2: PL002 clarified lysate and insoluble fraction

Lanes 3 and 4: control pET-28a (+) empty vector clarified lysate and insoluble fraction

Lanes 5 and 6: control untransformed ArcticExpress (DE3) clarified lysate and insoluble fraction

For image C: Lane 1 and 2: Flowthrough and wash fraction (50 mM) of PL002. Lane 3-7: imidazole elution steps (150 mM)

Purification of PL002 was aided by recombinant production in the Arctic Express cell line (Figure 3A and C). The visualization of purified protein was complicated by the similarity of the size of PL002 at 65kDa and the ArcticExpress (DE3) cell line chaperone, Cpn 2 at 57 kDa. Due to this size similarity, a His-tag Western blot analysis was employed to confirm the presence of the protein (Figure 3B). Pure elution of PL002 was ensured by increasing imidazole concentration of the binding buffer by 10mM, as demonstrated by previous separation studies (Hartinger et al. 2010). The overall recovery of soluble fractions purified in one step affinity chromatography was 60%.

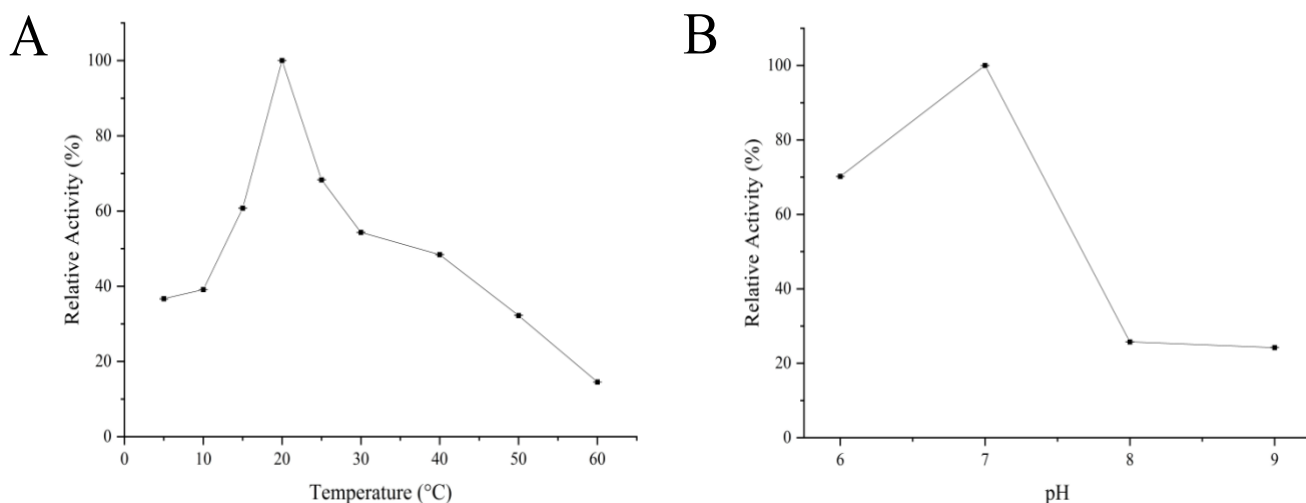

**Figure 4: The effect of temperature (A) and pH (B) on PL002 lipase activity on the PNPB substrate**

Each data point represents the mean  $\pm$  standard deviation (SD) of five replicate assays. Activity profiles were expressed in relation to the maximum value (=100%).

Under the conditions evaluated, enzyme characterisation using the PNPB substrate showed a peak in activity for PL002 at 20°C and pH7 (Figure 4A and B). It was observed that 60% of relative activity was retained between 15 and 25 °C, however PL002 loses close to 90% of its activity at temperatures greater than 50 °C which implies that this lipase meets the definition of cold active (Gatti-Lafranconi et al. 2010). Lipases isolated from other eukaryotic sources have been identified to possess a similar pH optimum within the range of 6.2 and 7 (van Kuiken and Behnke 1994). This pH condition is crucial to maintaining the form of the lipolytic lid in lipases, which is composed of charged residues required for substrate binding.

The highest activity using PNPB synthetic substrate measured for PL002 was 3.16  $\pm$  0.14 U/mg under conditions of 1mM of PNPB, 20 °C and pH 7. To understand this in relation to other enzymes, a meta-analysis was conducted to compare reported lipase activity against the PNPB substrate in a range of psychrophilic, mesophilic, and thermophilic enzymes (Figure 5). In comparison to other eukaryotic lipases, PL002 exhibited a higher activity on this substrate and the lowest optimum temperature (Supplementary Table 1.3). This is consistent with the evolutionary adaptation of *S. thompsoni* to life in a low temperature marine environment and highlights the potential of this organism as a source of novel psychrophilic biocatalysts.

Furthermore, this result provides an additional putative example of a genomic change in *S. thompsoni* in response to low temperatures, adding to reports of increases in nuclear ribosomal DNA content in this species that may represent an adaptation compensating for slower metabolism at low temperatures (Goodall-Copestake 2018; Jue et al. 2016). Subsequent temperature studies with PL002 could include the equivalent lipase from a salp species found in a more tropical climate. This will encourage further refinements of *in silico* bioprospecting whilst functionally characterising eukaryotic cold candidates.

Marine invertebrate genomes have been mined to uncover multiple lipase genes that display different specificities towards different substrate sizes. Studies on the lipid metabolism of the whiteleg shrimp *Penaeus vannamei* (Rivera-Pérez and García-Carreño 2011) found optimal enzyme activity when substrates of a similar nature to their feed source were used, compared to the synthetic substrate. Hydrolysis of neutral lipids is an important aspect of organismal development, and many organisms possess lipase genes defined as functionally hydrolysing triacylglycerol substrates (Rivera-Perez 2015). A complex suite of such enzymes probably works in tandem for digestive purposes. Indeed, it is conceivable that *S. thompsoni* may have a more specialised lipase profile, such as that found in the gastric pouches of the jellyfish (*Stomolophus sp. 2*) where, in comparison to lipases from other invertebrates, lipolytic enzymes favour shorter and medium length triacylglycerides (Martínez-Pérez et al. 2020). The size of carboxyl ester based substrates hydrolysed has been used to categorise enzymes candidates as either a lipase or esterase. A more complete classification of lipolytic esterases should also investigate the ability to hydrolyse long chain fatty acids (Ali, Verger, and Abousalham 2012). Generally, it has been identified that true lipases hydrolyse longer chain fatty acid-based substrates while esterases act on shorter chain substrates, such as PNPB (De Santi et al. 2014). Multiple lipase candidates may exist in eukaryotic invertebrates therefore the activity profile generated from *in vitro* characterisation can be used to describe enzyme function and activity against a wide range of substrates (Vолоkita et al. 2011). An alternative bioprospecting approach may be to use proteomic and metabolomic trials to understand the lipid preferences of enzymes *in vivo* to uncover industrially promising candidates.

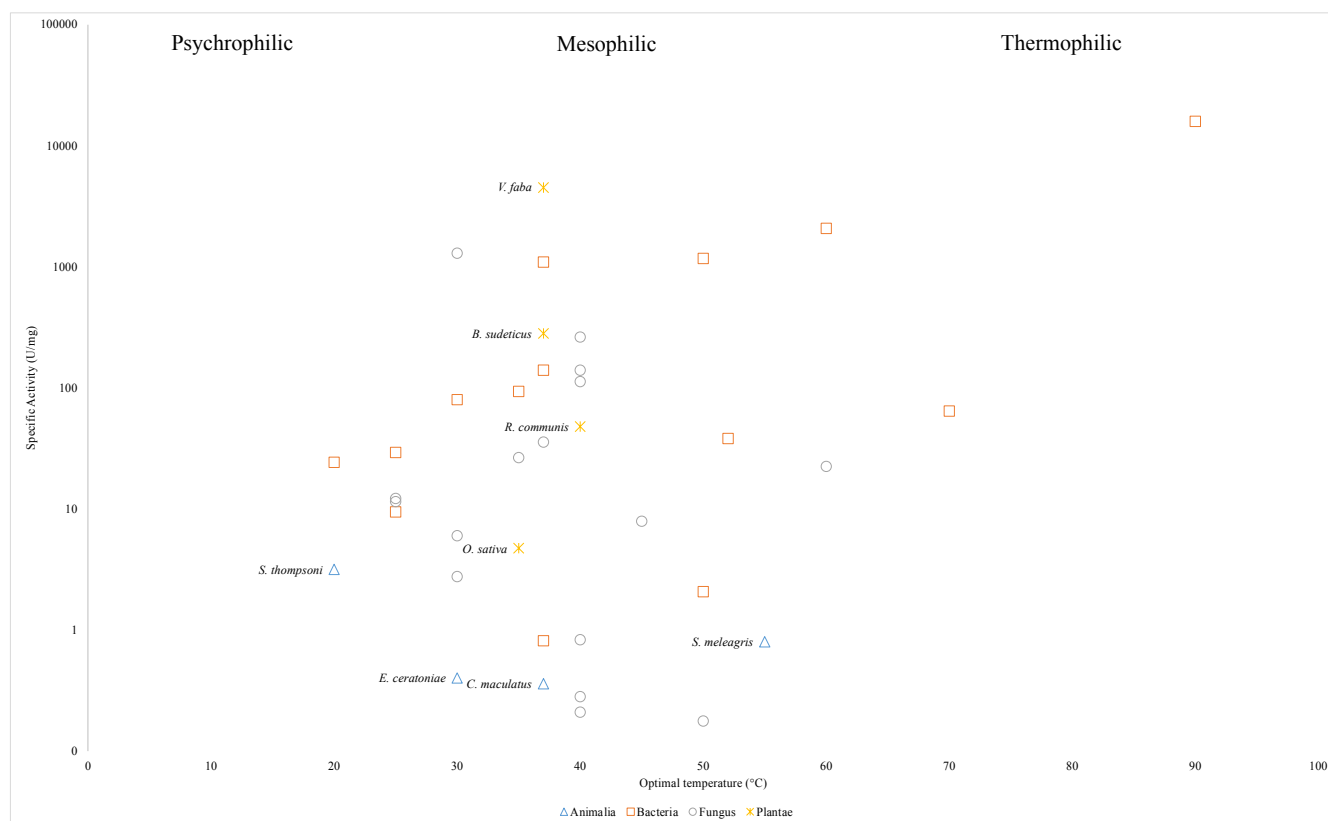

**Figure 5: Specific activity (U/mg) of PNPB active lipases from Bacteria, Animalia, Fungus and Plantae**

Temperature domains adapted from (D'Amico et al. 2003). Animalia and plantae lipases are labelled in the figure. The origin of each lipase and its class are detailed in Supplementary information Table 1.3

While the activity for PL002 using synthetic substrate, PNPB, was within detectable limits, the impact of biological modifications such as the addition of affinity tags on enzymes, including hexahistadine tags, have been shown to diminish PNP ester hydrolysis activity (de Almeida et al. 2018). It has been previously demonstrated for a *Staphylococcus aureus* lipase that an N terminal His tag may alter the specific activity, the chain length selectivity and the thermostability (Horchani et al. 2009). In another case, it was reported that there was a 33% increase in specific activity as well as preference towards medium length chain fatty acid pNP-laurate (C12) of an untagged recombinantly produced lipase from *Geobacillus kaustophilus* (Özdemir, Tülek, and Erdoğan 2021). There has also been evidence which indicates that this hexahistadine tag can alter the quaternary structure of proteins (Carson et al. 2007) impacting their specific activities. As such, it is plausible that such a modification may have altered the

activity of the recombinantly produced affinity tagged protein PL002. Subsequent analyses could explore this further through a comparison against histidine cleaved proteins generated at both the expression and characterisation stages of *in vitro* enzyme production.

To expand the toolkit for low temperature biocatalysis, the pipeline demonstrated here for the identification of cold active lipase candidates using *in silico* methods can be followed. Here we have employed this workflow to identify a pancreatic-like lipase from assembled genomes constructed on sequence homologies of annotated genes. For prokaryotic organisms, culture-independent methods are already a powerful means of overcoming practical limitations in enzyme identification (Sysoev et al. 2021). The characterisation of PL002 from *S.thompsoni* is a step towards a wider understanding of how the expanding database of eukaryotic sequences from extreme environments can be a source of promising biocatalysts for temperature-specific industrial applications.

### Summary

This study combined *in silico* bioprospecting with the *in vitro* expression of a gene of interest to characterise a novel source of biocatalytic activity. To our knowledge, this is the first time such an approach has been used to characterise a lipase from a marine tunicate. The lipase was identified from *S. thompsoni* and exhibited psychrophilic characteristics in accordance with the cold Antarctic marine habitat of this organism, retaining over 60% activity between 15 to 25 °C and optimal conditions of pH 7. In future, bioprospecting of the genomic and transcriptomic data available on digestive enzymes from marine invertebrates inhabiting low temperature environments may yield biocatalysts with novel functionality.

### Acknowledgements

ER was funded through an EPSRC studentship (Grant reference number: EP/R512400/1). BP and WGC acknowledge financial support for initial salp gene expression work from the EPSRC Centre for Nature Inspired Engineering (EP/K038656/1)



## References

- Agarwala, Richa et al. 2018. “Database Resources of the National Center for Biotechnology Information.” *Nucleic Acids Research* 46(D1): D8–13. <https://pubmed.ncbi.nlm.nih.gov/29140470/> (October 16, 2021).
- Akbari, Neda et al. 2010. “High-Level Expression of Lipase in Escherichia Coli and Recovery of Active Recombinant Enzyme through in Vitro Refolding.” *Protein Expression and Purification* 70(1): 75–80. <https://www.sciencedirect.com/science/article/pii/S1046592809002071> (December 30, 2018).
- Ali, Yassine Ben, Robert Verger, and Abdelkarim Abousalham. 2012. “Lipases or Esterases: Does It Really Matter? Toward a New Bio-Physico-Chemical Classification.” *Methods in Molecular Biology* 861: 31–51. [https://link.springer.com/protocol/10.1007/978-1-61779-600-5\\_2](https://link.springer.com/protocol/10.1007/978-1-61779-600-5_2) (January 16, 2022).
- de Almeida, Janaina Marques et al. 2018. “Tailoring Recombinant Lipases: Keeping the His-Tag Favors Esterification Reactions, Removing It Favors Hydrolysis Reactions.” *Scientific Reports* 2018 8:1 8(1): 1–11. <https://www.nature.com/articles/s41598-018-27579-8> (November 9, 2021).
- Altschul, S. 1997. “Gapped BLAST and PSI-BLAST: A New Generation of Protein Database Search Programs.” *Nucleic Acids Research* 25(17): 3389–3402. <https://www.ncbi.nlm.nih.gov/pmc/articles/PMC146917/> (October 16, 2021).
- Ambrosino, Luca et al. 2019. “Functional Conserved Non-Coding Elements among Tunicates and Chordates.” *Developmental Biology* 448(2): 101–10. <https://linkinghub.elsevier.com/retrieve/pii/S0012160617309090> (March 26, 2020).
- Artimo P. 2020. “ExPASy: SIB Bioinformatics Resource Portal.” <https://www.expasy.org/about> (April 5, 2020).
- Attwood, T.K K. et al. 2003. “PRINTS and Its Automatic Supplement, PrePRINTS.” *Nucleic Acids Research* 31(1): 400. <https://www.ncbi.nlm.nih.gov/pmc/articles/PMC165477/> (April 15, 2020).
- Badgajar, Kirtikumar C., and Bhalchandra M. Bhanage. 2015. “Immobilization of Lipase on Biocompatible Co-Polymer of Polyvinyl Alcohol and Chitosan for Synthesis of Laurate Compounds in Supercritical Carbon Dioxide Using Response Surface Methodology.” *Process Biochemistry* 50(8): 1224–36.

- <https://linkinghub.elsevier.com/retrieve/pii/S1359511315002469> (November 8, 2021).
- Badgajar, Vivek C., Kirtikumar C. Badgajar, Pravin M. Yeole, and Bhalchandra M. Bhanage. 2017. "Immobilization of Rhizomucor Miehei Lipase on a Polymeric Film for Synthesis of Important Fatty Acid Esters: Kinetics and Application Studies." *Bioprocess and Biosystems Engineering* 40(10): 1463–78. <https://link.springer.com/article/10.1007/s00449-017-1804-0> (November 8, 2021).
- Bateman, Alex, and Richard Sandford. 1999. "The PLAT Domain: A New Piece in the PKD1 Puzzle." *Current Biology* 9(16): R588–90. <http://www.cell.com/article/S0960982299803807/fulltext> (April 15, 2020).
- Batta-Lona, PG et al. 2017. "Transcriptomic Profiles of Spring and Summer Populations of the Southern Ocean Salp, *Salpa Thompsoni*, in the Western Antarctic Peninsula Region." *Polar Biology* 40(6): 1261–76. <http://link.springer.com/10.1007/s00300-016-2051-6> (October 16, 2021).
- Belval, Lorène et al. 2015. "A Fast and Simple Method to Eliminate Cpn60 from Functional Recombinant Proteins Produced by *E. Coli* Arctic Express." *Protein Expression and Purification* 109: 29–34. <https://www.sciencedirect.com/science/article/pii/S1046592815000108> (May 13, 2019).
- Bradford, M. 1976. "A Rapid and Sensitive Method for the Quantitation of Microgram Quantities of Protein Utilizing the Principle of Protein-Dye Binding." *Analytical Biochemistry* 72(1–2): 248–54. <https://linkinghub.elsevier.com/retrieve/pii/S0003269776699996> (February 19, 2021).
- Brumlik, Michael J., and J. Thomas Buckley. 1996. "Identification of the Catalytic Triad of the Lipase/Acyltransferase from *Aeromonas Hydrophila*." *Journal of Bacteriology* 178(7): 2060–64. <https://journals.asm.org/doi/abs/10.1128/jb.178.7.2060-2064.1996> (November 10, 2021).
- Burnette, W. Neal. 1981. "'Western Blotting': Electrophoretic Transfer of Proteins from Sodium Dodecyl Sulfate-Polyacrylamide Gels to Unmodified Nitrocellulose and Radiographic Detection with Antibody and Radioiodinated Protein A." *Analytical Biochemistry* 112(2): 195–203.
- Carniel, Adriano et al. 2017. "Lipase from *Candida Antarctica* (CALB) and Cutinase from *Humicola Insolens* Act Synergistically for PET Hydrolysis to Terephthalic Acid." *Process Biochemistry* 59: 84–90.
- Carson, Mike et al. 2007. "His-Tag Impact on Structure." *Acta Crystallographica Section D Biological Crystallography* 63(3): 295–301. <http://scripts.iucr.org/cgi->

bin/paper?S0907444906052024 (October 27, 2021).

Cavicchioli, R et al. 2011. “Biotechnological Uses of Enzymes from Psychrophiles.” *Microbial Biotechnology* 4(4): 449–60.

<https://www.ncbi.nlm.nih.gov/pmc/articles/PMC3815257/pdf/mbt0004-0449.pdf>

(October 17, 2017).

Chandra, Prem, Enespa, Ranjan Singh, and Pankaj Kumar Arora. 2020. “Microbial Lipases and Their Industrial Applications: A Comprehensive Review.” *Microbial Cell Factories* 19(1): 169. <https://microbialcellfactories.biomedcentral.com/articles/10.1186/s12934-020-01428-8> (February 2, 2021).

Chen, Chin-Chung et al. 2019. “Two Novel Lipases Purified from Rice Bran Displaying Lipolytic and Esterification Activities.” *International Journal of Biological Macromolecules* 139: 298–306.

<https://linkinghub.elsevier.com/retrieve/pii/S0141813019351402> (November 9, 2021).

Colant, Noelle et al. 2021. “A Rational Approach to Improving Titer in Escherichia Coli-Based Cell-Free Protein Synthesis Reactions.” *Biotechnology Progress* 37(1): e3062. <https://onlinelibrary.wiley.com/doi/full/10.1002/btpr.3062> (December 19, 2021).

Colbourne, John K. et al. 2011. “The Ecoresponsive Genome of *Daphnia Pulex*.” *Science* 331(6017): 555–61. <https://www.science.org/doi/abs/10.1126/science.1197761> (January 11, 2022).

Cong, Shanzi et al. 2019. “Synthesis of Flavor Esters by a Novel Lipase from *Aspergillus Niger* in a Soybean-Solvent System.” *3 Biotech* 9(6): 244. [/pmc/articles/PMC6545293/?report=abstract](https://pubmed.ncbi.nlm.nih.gov/pmc/articles/PMC6545293/?report=abstract) (February 2, 2021).

D’Amico, Salvino, Jean-Claude Marx, Charles Gerday, and Georges Feller. 2003. “Activity-Stability Relationships in Extremophilic Enzymes.” *Journal of Biological Chemistry* 278(10): 7891–96. <http://www.ncbi.nlm.nih.gov/pubmed/12511577> (October 21, 2017).

Denesyuk, Alexander et al. 2020. “The Acid-Base-Nucleophile Catalytic Triad in ABH-Fold Enzymes Is Coordinated by a Set of Structural Elements.” *PLOS ONE* 15(2): e0229376. <https://journals.plos.org/plosone/article?id=10.1371/journal.pone.0229376> (January 3, 2022).

Deng, Dun et al. 2016. “Functional Characterization of a Novel Marine Microbial GDSE Lipase and Its Utilization in the Resolution of (±)-1-Phenylethanol.” *Applied Biochemistry and Biotechnology* 179(1): 75–93. <https://link.springer.com/article/10.1007/s12010-016-1980-4> (November 7, 2021).

Duan, Xiaojie et al. 2019. “Biochemical Characterization of a Novel Lipase from *Malbranchea*

- Cinnamomea Suitable for Production of Lipolyzed Milkfat Flavor and Biodegradation of Phthalate Esters.” *Food Chemistry* 297: 124925. <https://linkinghub.elsevier.com/retrieve/pii/S030881461931012X> (October 26, 2021).
- Duvaud, Séverine et al. 2021. “Expasy, the Swiss Bioinformatics Resource Portal, as Designed by Its Users.” *Nucleic Acids Research* 49(W1): W216–27. <https://academic.oup.com/nar/article/49/W1/W216/6225225> (February 6, 2022).
- Feller, Georges, and Charles Gerday. 2003. “Psychrophilic Enzymes: Hot Topics in Cold Adaptation.” *Nature Reviews Microbiology*.
- Ferrer, Manuel et al. 2003. “Chaperonins Govern Growth of Escherichia Coli at Low Temperatures.” *Nature Biotechnology* 21(11): 1266–67.
- Foxton, P. 1966. *The Distribution and Life-History of Salpa Thompsoni Foxton with Observations on Salpa Gerlachei*. [https://books.google.co.uk/books/about/The\\_distribution\\_and\\_life\\_history\\_of\\_Sal.html?id=njk\\_AAAAYAAJ&redir\\_esc=y](https://books.google.co.uk/books/about/The_distribution_and_life_history_of_Sal.html?id=njk_AAAAYAAJ&redir_esc=y) (January 7, 2022).
- Gao, Jiabin et al. 2018. “Cloning, Overexpression, and Characterization of a Novel Organic Solvent-Tolerant Lipase from Paenibacillus Pasadenensis CS0611.” *Chinese Journal of Catalysis* 39(5): 937–45. <https://linkinghub.elsevier.com/retrieve/pii/S1872206718630335> (October 26, 2021).
- Gasteiger, E et al. 2005. *Protein Identification and Analysis Tools on the ExPASy Server*. John M. Wa. <https://web.expasy.org/protparam/protpar-ref.html> (October 21, 2021).
- Gatti-Lafranconi, Pietro et al. 2010. “Evolution of Stability in a Cold-Active Enzyme Elicits Specificity Relaxation and Highlights Substrate-Related Effects on Temperature Adaptation.” *Journal of Molecular Biology* 395(1): 155–66.
- Godeaux, Jean E a. 1981. “Functions of the Endostyle in the Tunicates.” *Bulletin of marine science* 45(2): 228–42.
- Goodall-Copestake, William Paul. 2018. “NrDNA:MtDNA Copy Number Ratios as a Comparative Metric for Evolutionary and Conservation Genetics.” *Heredity* 2018 121:2 121(2): 105–11. <https://www.nature.com/articles/s41437-018-0088-8> (October 10, 2021).
- Gough, J, K Karplus, R Hughey, and C Chothia. 2001. “Assignment of Homology to Genome Sequences Using a Library of Hidden Markov Models That Represent All Proteins of Known Structure.” *Journal of molecular biology* 313(4): 903–19. <https://pubmed.ncbi.nlm.nih.gov/11697912/> (October 27, 2021).
- von Harbou, Lena et al. 2011. “Salps in the Lazarev Sea, Southern Ocean: I. Feeding Dynamics.” *Marine Biology* 158(9): 2009–26.

- Harteringer, Doris et al. 2010. “Enhancement of Solubility in Escherichia Coli and Purification of an Aminotransferase from *Spingopyxis* Sp. MTA144 for Deamination of Hydrolyzed Fumonisin B1.” *Microbial Cell Factories* 9(1): 62. <http://microbialcellfactories.biomedcentral.com/articles/10.1186/1475-2859-9-62> (May 13, 2019).
- Henschke, Natasha, and Evgeny A. Pakhomov. 2019. “Latitudinal Variations in *Salpa Thompsoni* Reproductive Fitness.” *Limnology and Oceanography* 64(2): 575–84. <https://onlinelibrary.wiley.com/doi/10.1002/lno.11061> (November 16, 2019).
- Horchani, Habib, Selmene Ouertani, Youssef Gargouri, and Adel Sayari. 2009. “The N-Terminal His-Tag and the Recombination Process Affect the Biochemical Properties of *Staphylococcus Aureus* Lipase Produced in *Escherichia Coli*.” *Journal of Molecular Catalysis B: Enzymatic* 61(3–4): 194–201. <https://linkinghub.elsevier.com/retrieve/pii/S1381117709001714> (October 23, 2017).
- Jain, Deepti, and Sandhya Mishra. 2015. “Multifunctional Solvent Stable *Bacillus* Lipase Mediated Biotransformations in the Context of Food and Fuel.” *Journal of Molecular Catalysis B: Enzymatic* 117: 21–30. <https://linkinghub.elsevier.com/retrieve/pii/S1381117715001009> (October 26, 2021).
- Ji, Xiuling et al. 2015. “Purification and Characterization of an Extracellular Cold-Adapted Alkaline Lipase Produced by Psychrotrophic Bacterium *Yersinia Enterocolitica* Strain KM1.” *Journal of Basic Microbiology* 55(6): 718–28. <https://onlinelibrary.wiley.com/doi/10.1002/jobm.201400730> (October 26, 2021).
- Jiang, Ling et al. 2014. “‘Amano’ Lipase DF-Catalyzed Efficient Synthesis of 2,2'-Arylmethylene Dicyclohexane-1,3-Dione Derivatives in Anhydrous Media.” *Chinese Chemical Letters* 25(8): 1190–92. <https://linkinghub.elsevier.com/retrieve/pii/S1001841714001600> (November 29, 2021).
- Jones, Philip et al. 2014. “InterProScan 5: Genome-Scale Protein Function Classification.” *Bioinformatics (Oxford, England)* 30(9): 1236–40. [/pmc/articles/PMC3998142/](https://pubmed.ncbi.nlm.nih.gov/24752621/) (April 17, 2020).
- Jue, Nathaniel K et al. 2016. “Rapid Evolutionary Rates and Unique Genomic Signatures Discovered in the First Reference Genome for the Southern Ocean Salp, *Salpa Thompsoni* (Urochordata, Thaliacea).” *Genome Biology and Evolution* 8(10): 3171–86. <https://www.ncbi.nlm.nih.gov/pmc/articles/PMC5174732/pdf/evw215.pdf> (December 11, 2017).
- Kawaguchi, Nanami et al. 2018. “A Novel Protocol for the Preparation of Active Recombinant

- Human Pancreatic Lipase from Escherichia Coli.” *Journal of biochemistry* 164(6): 407–14. <https://pubmed.ncbi.nlm.nih.gov/30101295/> (December 24, 2021).
- Kearse, Matthew et al. 2012. “Geneious Basic: An Integrated and Extendable Desktop Software Platform for the Organization and Analysis of Sequence Data.” *Bioinformatics (Oxford, England)* 28(12): 1647–49. <http://www.ncbi.nlm.nih.gov/pubmed/22543367> (June 5, 2018).
- Keith, David, Jose A.Ferrer-Paris, Emily Nicholson, and Richard Kingsford. 2020. “IUCN Global Ecosystem Typology 2.0: Descriptive Profiles for Biomes and Ecosystem Functional Groups.” *IUCN Global Ecosystem Typology 2.0: descriptive profiles for biomes and ecosystem functional groups*.
- Khan, Faez Iqbal et al. 2017. “The Lid Domain in Lipases: Structural and Functional Determinant of Enzymatic Properties.” *Frontiers in Bioengineering and Biotechnology* 5(MAR): 16. <http://www.ncbi.nlm.nih.gov/pubmed/28337436> (July 31, 2018).
- van Kuiken, Barbara A., and W.David Behnke. 1994. “The Activation of Porcine Pancreatic Lipase by Cis-Unsaturated Fatty Acids.” *Biochimica et Biophysica Acta (BBA) - Lipids and Lipid Metabolism* 1214(2): 148–60. <https://reader.elsevier.com/reader/sd/pii/0005276094900396?token=76125EC1B8823F3ECB3C0035D8498002986DAB4BB382FD574EF942FACE9DBF596EAA7C49E250428CE4283DC51F3A385C&originRegion=eu-west-1&originCreation=20220116171519> (January 16, 2022).
- Lampi, Anna Maija, Zhen Yang, Otto Mustonen, and Vieno Piironen. 2020. “Potential of Faba Bean Lipase and Lipxygenase to Promote Formation of Volatile Lipid Oxidation Products in Food Models.” *Food Chemistry* 311(November 2019): 125982. <https://doi.org/10.1016/j.foodchem.2019.125982>.
- Lazniewski, Michal et al. 2011. “Novel Transmembrane Lipases of Alpha/Beta Hydrolase Fold.” *FEBS Letters* 585(6): 870–74.
- Li, Qi et al. 2021. “A Novel Lipase from *Aspergillus Oryzae* WZ007 Catalyzed Synthesis of Brivaracetam Intermediate and Its Enzymatic Characterization.” *Chirality* 33(2): 62–71. <https://onlinelibrary.wiley.com/doi/10.1002/chir.23286> (November 7, 2021).
- Li, Yue, Guorui Li, Huajun Sun, and Yongsheng Chen. 2021. “Characterization of a Novel Sn1,3 Lipase from *Ricinus Communis* L. Suitable for Production of Oleic Acid-Palmitic Acid-Glycerol Oleate.” *Scientific Reports* 11(1).
- Lin, Yanping, Qiming Li, Longxiang Xie, and Jianping Xie. 2017. “*Mycobacterium Tuberculosis* Rv1400c Encodes Functional Lipase/Esterase.” *Protein Expression and*

- Purification* 129: 143–49.  
<https://linkinghub.elsevier.com/retrieve/pii/S1046592816300675> (October 26, 2021).
- Lowe, Mark E. 2002. “The Triglyceride Lipases of the Pancreas.” *Journal of Lipid Research* 43(12): 2007–16. <https://linkinghub.elsevier.com/retrieve/pii/S0022227520327267> (January 3, 2022).
- Lu, S et al. 2020. “CDD/SPARCLE: The Conserved Domain Database in 2020.” *Nucleic acids research* 48(D1): D265–68. <https://pubmed.ncbi.nlm.nih.gov/31777944/> (October 27, 2021).
- Malaikozhundan, Balasubramanian, and Jayaraj Vinodhini. 2018. “Nanopesticidal Effects of Pongamia Pinnata Leaf Extract Coated Zinc Oxide Nanoparticle against the Pulse Beetle, *Callosobruchus Maculatus*.” *Materials Today Communications* 14: 106–15. <https://linkinghub.elsevier.com/retrieve/pii/S2352492817302829> (November 8, 2021).
- Manasian, Panagiotis et al. 2020. “First Evidence of Acyl-Hydrolase/Lipase Activity From Human Probiotic Bacteria: *Lactobacillus Rhamnosus* GG and *Bifidobacterium Longum* NCC 2705.” *Frontiers in Microbiology* 11: 1534. <https://www.frontiersin.org/article/10.3389/fmicb.2020.01534/full> (November 7, 2021).
- Martínez-Pérez, Raul B. et al. 2020. “Cannonball Jellyfish Digestion: An Insight into the Lipolytic Enzymes of the Digestive System.” *PeerJ* 8: e9794. <https://peerj.com/articles/9794> (November 8, 2021).
- Mavromatis, Konstantinos et al. 2002. “Exploring the Role of a Glycine Cluster in Cold Adaptation of an Alkaline Phosphatase.” *European journal of biochemistry* 269(9): 2330–35. <https://pubmed.ncbi.nlm.nih.gov/11985615/> (April 9, 2020).
- Memarpour-Yazdi, Mina, Hamid Reza Karbalaei-Heidari, and Mohammad Mahdi Doroodmand. 2018. “Enantioselective Hydrolysis of Ibuprofen Ethyl Ester by a Thermophilic Immobilized Lipase, ELT, from *Rhodothermus Marinus*.” *Biochemical Engineering Journal* 130: 55–65. <https://linkinghub.elsevier.com/retrieve/pii/S1369703X17303315> (November 8, 2021).
- Mesbah, Noha M. 2019. “Covalent Immobilization of a Halophilic, Alkalithermostable Lipase LipR2 on Florisil® Nanoparticles for Production of Alkyl Levulinates.” *Archives of Biochemistry and Biophysics* 667: 22–29. <https://linkinghub.elsevier.com/retrieve/pii/S0003986119301420> (November 7, 2021).
- Metpally, Raghu Prasad Rao, and Boojala Vijay B. Reddy. 2009. “Comparative Proteome Analysis of Psychrophilic versus Mesophilic Bacterial Species: Insights into the Molecular Basis of Cold Adaptation of Proteins.” *BMC Genomics* 10: 11.

/pmc/articles/PMC2653534/ (January 3, 2022).

Mistry, Jaina et al. 2021. “Pfam: The Protein Families Database in 2021.” *Nucleic Acids Research* 49(D1): D412–19. <https://academic.oup.com/nar/article/49/D1/D412/5943818> (October 18, 2021).

de Moraes, Wilson Galvão et al. 2016. “Optimization of the Production and Characterization of Lipase from *Candida Rugosa* and *Geotrichum Candidum* in Soybean Molasses by Submerged Fermentation.” *Protein Expression and Purification* 123: 26–34. <https://linkinghub.elsevier.com/retrieve/pii/S1046592816300481> (November 8, 2021).

Moyer, Craig L, and Richard Y Morita. 2007. “Psychrophiles and Psychrotrophs.” In *ELS*, Chichester, UK: Wiley, 1–6. <http://doi.wiley.com/10.1002/9780470015902.a0000402.pub2> (December 23, 2020).

Nielsen, Henrik. 2017. “Predicting Secretory Proteins with SignalP.” *Methods in molecular biology (Clifton, N.J.)* 1611: 59–73. <https://pubmed.ncbi.nlm.nih.gov/28451972/> (July 6, 2022).

Noro, Jennifer, Tarsila G. Castro, Artur Cavaco-Paulo, and Carla Silva. 2020. “Substrate Hydrophobicity and Enzyme Modifiers Play a Major Role in the Activity of Lipase from *Thermomyces Lanuginosus*.” *Catalysis Science & Technology* 10(17): 5913–24. <https://pubs.rsc.org/en/content/articlehtml/2020/cy/d0cy00912a> (October 26, 2021).

Ollis, David L.; et al. 1992. “The Hydrolase Fold.” <https://www.rug.nl/research/portal/files/3321987/1992ProteinEngOllis.pdf> (December 19, 2017).

Ozcan, Birgul, Gul Ozyilmaz, Cumhur Cokmus, and Mahmut Caliskan. 2009. “Characterization of Extracellular Esterase and Lipase Activities from Five Halophilic Archaeal Strains.” *Journal of Industrial Microbiology and Biotechnology* 36(1): 105–10. <https://link.springer.com/article/10.1007/s10295-008-0477-8> (December 9, 2020).

Özdemir, F. İnci, Ahmet Tülek, and Davut Erdoğan. 2021. “Identification and Heterologous Production of a Lipase from *Geobacillus Kaustophilus* DSM 7263T and Tailoring Its N-Terminal by a His-Tag Epitope.” *Protein Journal* 40(3): 436–47. <https://link.springer.com/article/10.1007/s10930-021-09987-4> (November 8, 2021).

Patel, Ramesh N., Amit Banerjee, and Laszlo J. Szarka. 1997. “Stereoselective Acetylation of [1-(Hydroxy)-4-(3-Phenyl)Butyl]Phosphonic Acid, Diethyl Ester.” *Tetrahedron: Asymmetry* 8(7): 1055–59.

Ranjbar, Mina et al. 2015. “Purification and Characterization of a Digestive Lipase in the Midgut of *Ectomyelois Ceratoniae* Zeller (Lepidoptera: Pyralidae).” *Frontiers in Life*



- Science* 8(1): 64–70.  
<https://www.tandfonline.com/action/journalInformation?journalCode=tflls21><http://dx.doi.org/10.1080/21553769.2014.961616> (November 7, 2021).
- Rivera-Perez, Crisalejandra. 2015. “Marine Invertebrate Lipases: Comparative and Functional Genomic Analysis.” *Comparative Biochemistry and Physiology Part D: Genomics and Proteomics* 15: 39–48. <https://linkinghub.elsevier.com/retrieve/pii/S1744117X15000386> (December 30, 2021).
- Rivera-Pérez, Crisalejandra, and Fernando García-Carreño. 2011. “Effect of Fasting on Digestive Gland Lipase Transcripts Expression in *Penaeus Vannamei*.” *Marine Genomics* 4(4): 273–78.
- Rosano, Germán L, and Eduardo A Ceccarelli. 2014. “Recombinant Protein Expression in *Escherichia Coli*: Advances and Challenges.” *Frontiers in Microbiology* 5: 172. <http://www.ncbi.nlm.nih.gov/pubmed/24860555> (July 22, 2019).
- Saavedra, Harry G. et al. 2018. “Dynamic Allostery Can Drive Cold Adaptation in Enzymes.” *Nature* 558(7709): 324–28. <http://www.nature.com/articles/s41586-018-0183-2> (July 22, 2019).
- Salloom, Leelatulasi et al. 2019. “New Recombinant Cold-Adapted and Organic Solvent Tolerant Lipase from Psychrophilic *Pseudomonas Sp. Lsk25*, Isolated from Signy Island Antarctica.” *International Journal of Molecular Sciences* 20(6).
- De Santi, Concetta et al. 2014. “A New Alkaliphilic Cold-Active Esterase from the Psychrophilic Marine Bacterium *Rhodococcus Sp.*: Functional and Structural Studies and Biotechnological Potential.” *Applied Biochemistry and Biotechnology* 172(6): 3054–68. <https://link.springer.com/article/10.1007/s12010-013-0713-1> (December 30, 2021).
- Schumann, Wolfgang, and Luis Carlos S. Ferreira. 2004. “Production of Recombinant Proteins in *Escherichia Coli*.” *Genetics and Molecular Biology* 27(3): 442–53. <https://doi.org/10.1186/s13068-020-01696-x> (March 26, 2020).
- Shao, Hua, Xianmei Hu, Liping Sun, and Wenshan Zhou. 2019. “Gene Cloning, Expression in *E. Coli*, and in Vitro Refolding of a Lipase from *Proteus Sp. NH 2-2* and Its Application for Biodiesel Production.” *Biotechnology Letters* 41(1): 159–69. <http://link.springer.com/10.1007/s10529-018-2625-1> (October 26, 2021).
- Siddiqui, Khawar Sohail et al. 2006. “Role of Lysine versus Arginine in Enzyme Cold-Adaptation: Modifying Lysine to Homo-Arginine Stabilizes the Cold-Adapted  $\alpha$ -Amylase from *Pseudoalteromonas Haloplanktis*.” *Proteins: Structure, Function, and Bioinformatics* 64(2): 486–501. <https://onlinelibrary.wiley.com/doi/10.1002/prot.20989>

(May 25, 2020).

- Van Soest, R.W.M. 1974. 22 *A Revision of the Genera Salpa Forskål*.  
<https://marinespecies.org/aphia.php?p=sourcedetails&id=166349> (January 3, 2022).
- Spriestersbach, Anne et al. 2015. “Purification of His-Tagged Proteins.” In *Methods in Enzymology*, Academic Press Inc., 1–15.
- Stauch, Benjamin, Stuart J Fisher, and Michele Cianci. 2015. “Open and Closed States of Candida Antarctica Lipase B: Protonation and the Mechanism of Interfacial Activation.” *Journal of lipid research* 56(12): 2348–58. <https://pubmed.ncbi.nlm.nih.gov/26447231/> (November 3, 2021).
- Sysoev, Maksim et al. 2021. “Bioprospecting of Novel Extremozymes From Prokaryotes—The Advent of Culture-Independent Methods.” *Frontiers in Microbiology* 12: 196.
- Tang, Lianghua et al. 2015. “Lid Hinge Region of Penicillium Expansum Lipase Affects Enzyme Activity and Interfacial Activation.” *Process Biochemistry* 50(8): 1218–23. <https://linkinghub.elsevier.com/retrieve/pii/S135951131500255X> (October 26, 2021).
- Tang, Shye-Jye et al. 2000. “Recombinant Expression of the Candida Rugosa Lip4 Lipase in Escherichia Coli.” *Protein Expression and Purification* 20(2): 308–13. <https://linkinghub.elsevier.com/retrieve/pii/S1046592800913044> (December 24, 2021).
- Tian, Kaiyuan, Kee Tai, Bryan Jian Wei Chua, and Zhi Li. 2017. “Directed Evolution of Thermomyces Lanuginosus Lipase to Enhance Methanol Tolerance for Efficient Production of Biodiesel from Waste Grease.” *Bioresource Technology* 245: 1491–97.
- Tian, Rui et al. 2015. “Expression and Characterization of a Novel Thermo-Alkalistable Lipase from Hyperthermophilic Bacterium Thermotoga Maritima.” *Applied Biochemistry and Biotechnology* 2015 176:5 176(5): 1482–97. <https://link.springer.com/article/10.1007/s12010-015-1659-2> (October 26, 2021).
- Ugras, Serpil. 2017. “Characterization of a Thermophilic Lipase from Bacillus Licheniformis Ht7 Isolated from Hayran Thermal Springs in Giresun.” *Romanian Biotechnological Letters* 22(1): 12297.
- Valdez-Cruz, Norma A. et al. 2017. “Production of a Recombinant Phospholipase A2 in Escherichia Coli Using Resonant Acoustic Mixing That Improves Oxygen Transfer in Shake Flasks.” *Microbial Cell Factories* 16(1): 129. <https://microbialcellfactories.biomedcentral.com/articles/10.1186/s12934-017-0746-1> (December 24, 2021).
- Veno, Jivitha et al. 2019. “Insight into Improved Thermostability of Cold-Adapted Staphylococcal Lipase by Glycine to Cysteine Mutation.” *Molecules* 24(17).

- [/pmc/articles/PMC6749283/?report=abstract](#) (June 23, 2020).
- Volokita, Micha, Tamar Rosilio-Brami, Natalia Rivkin, and Moriyah Zik. 2011. “Combining Comparative Sequence and Genomic Data to Ascertain Phylogenetic Relationships and Explore the Evolution of the Large GDSL-Lipase Family in Land Plants.” *Molecular Biology and Evolution* 28(1): 551–65. <https://academic.oup.com/mbe/article/28/1/551/984066> (December 30, 2021).
- Wagner Fernandes Duarte, Alysson et al. 2018. “Critical Reviews in Biotechnology Cold-Adapted Enzymes Produced by Fungi from Terrestrial and Marine Antarctic Environments Cold-Adapted Enzymes Produced by Fungi from Terrestrial and Marine Antarctic Environments.” <https://www.tandfonline.com/action/journalInformation?journalCode=ibty20> (March 26, 2020).
- Wang, Guilong et al. 2015. “Probing Role of Key Residues in the Divergent Evolution of *Yarrowia Lipolytica* Lipase 2 and *Aspergillus Niger* Eruloyl Esterase A.” *Microbiological Research* 178: 27–34. <https://linkinghub.elsevier.com/retrieve/pii/S0944501315001081> (October 26, 2021).
- Wang, Guozeng et al. 2016. “A Novel Cold-Adapted and Highly Salt-Tolerant Esterase from *Alkalibacterium* Sp. SL3 from the Sediment of a Soda Lake.” *Scientific Reports* 6(1): 19494. <http://www.nature.com/articles/srep19494> (June 5, 2019).
- Waterhouse, Andrew et al. 2018. “SWISS-MODEL: Homology Modelling of Protein Structures and Complexes.” *Nucleic Acids Research* 46(W1): W296–303. <https://academic.oup.com/nar/article/46/W1/W296/5000024> (December 18, 2021).
- Wilson, Derek et al. 2009. “SUPERFAMILY—Sophisticated Comparative Genomics, Data Mining, Visualization and Phylogeny.” *Nucleic Acids Research* 37(suppl\_1): D380–86. [/pmc/articles/PMC2686452/](#) (October 27, 2021).
- Winkler, F. K., A. D’Arcy, and W. Hunziker. 1990. “Structure of Human Pancreatic Lipase.” *Nature* 343(6260): 771–74. <http://www.nature.com/articles/343771a0> (August 12, 2018).
- Winkler, U K, and M Stuckmann. 1979. “Glycogen, Hyaluronate, and Some Other Polysaccharides Greatly Enhance the Formation of Exolipase by *Serratia Marcescens*.” *Journal of Bacteriology* 138(3).
- Yildirim, Deniz et al. 2019. “Improvement of Activity and Stability of Rhizomucor Miehei Lipase by Immobilization on Nanoporous Aluminium Oxide and Potassium Sulfate Microcrystals and Their Applications in the Synthesis of Aroma Esters.” *Biocatalysis and Biotransformation* 37(3): 210–23.

<https://www.tandfonline.com/doi/abs/10.1080/10242422.2018.1530766> (October 26, 2021).

Zhao et al. 2021. “Characterization of a Novel Lipase from *Bacillus Licheniformis* NCU CS-5 for Applications in Detergent Industry and Biodegradation of 2,4-D Butyl Ester.” *International Journal of Biological Macromolecules* 176: 126–36.

Zhao, Jiong-feng, Jian-ping Lin, Li-rong Yang, and Mian-bin Wu. 2019. “Enhanced Performance of *Rhizopus Oryzae* Lipase by Reasonable Immobilization on Magnetic Nanoparticles and Its Application in Synthesis 1,3-Diacylglycerol.” *Applied Biochemistry and Biotechnology* 2019 188:3 188(3): 677–89. <https://link.springer.com/article/10.1007/s12010-018-02947-2> (October 26, 2021).

Zhou, Ye et al. 2019. “The Additive Mutational Effects from Surface Charge Engineering: A Compromise between Enzyme Activity, Thermostability and Ionic Liquid Tolerance.” *Biochemical Engineering Journal* 148: 195–204. <https://linkinghub.elsevier.com/retrieve/pii/S1369703X1830278X> (October 21, 2021).

Zhu, Guoying et al. 2021. “Structure and Function of Pancreatic Lipase-Related Protein 2 and Its Relationship With Pathological States.” *Frontiers in Genetics* 12: 1061. <https://www.frontiersin.org/articles/10.3389/fgene.2021.693538/full> (October 16, 2021).
